# Supplementary material for: Prognostic factors and population-based analysis of melanoma with sentinel lymph node biopsy
Source: PubMed Central journal article supplement (PMC8521595; doi:10.1038/s41598-021-99950-1), 2021-10-15
Supplement: 41598_2021_99950_MOESM1_ESM.pdf [file 41598_2021_99950_MOESM1_ESM.pdf]

### Supplementary Figure 1. Flowchart of patient selection in sensitivity analysis

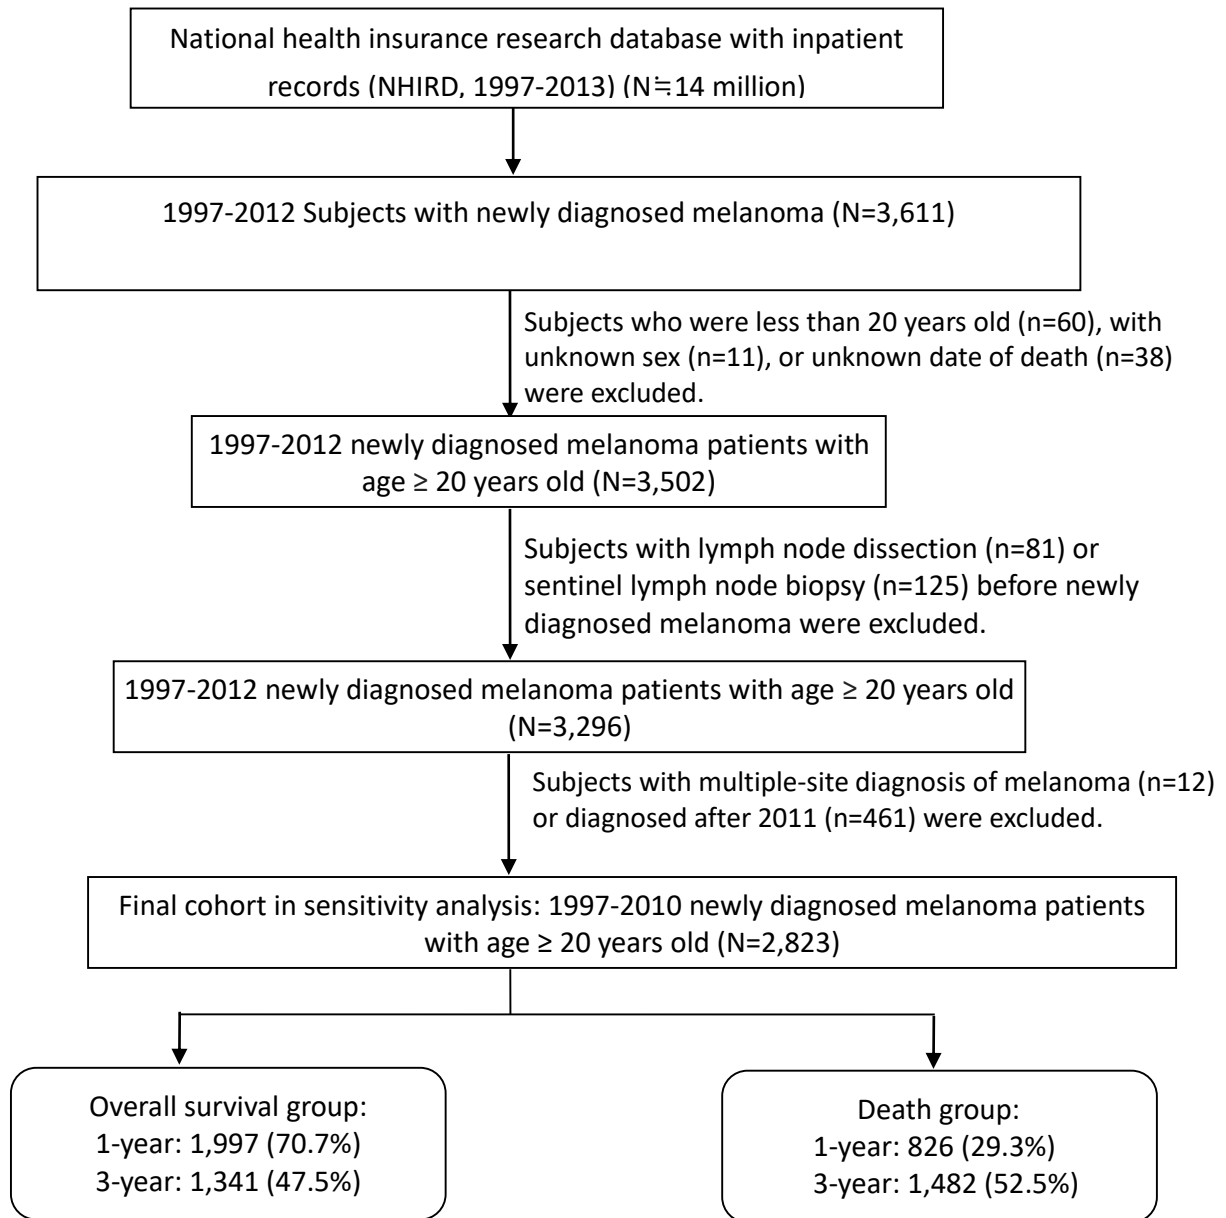

**Supplementary Table 1. Baseline characteristics before and after Propensity Score Matching**

| Characteristics                        | Unmatched Patients<br>(N=2823) |                 |             | Propensity-Score-Matched Patients<br>(N=2049) |                 |             |
|----------------------------------------|--------------------------------|-----------------|-------------|-----------------------------------------------|-----------------|-------------|
|                                        | No SLNB<br>(n=2044)            | SLNB<br>(n=779) | SMD         | No SLNB<br>(n=1366)                           | SLNB<br>(n=683) | SMD         |
|                                        | Age, years, mean±SD            | 66.4 ± 16.2     | 61.0 ± 15.7 | 0.3411                                        | 63.5 ± 16.0     | 62.7 ± 15.4 |
| Age group, %                           |                                |                 |             |                                               |                 |             |
| < 50                                   | 332 (16.2)                     | 183 (23.5)      | 0.1824      | 261 (19.1)                                    | 134 (19.6)      | 0.0130      |
| 50-59                                  | 268 (13.1)                     | 154 (19.8)      | 0.1803      | 225 (16.5)                                    | 121 (17.7)      | 0.0331      |
| 60-69                                  | 405 (19.8)                     | 173 (22.2)      | 0.0588      | 315 (23.1)                                    | 161 (23.6)      | 0.0121      |
| 70-79                                  | 590 (28.9)                     | 199 (25.5)      | 0.0746      | 354 (25.9)                                    | 197 (28.8)      | 0.0657      |
| ≥ 80                                   | 449 (22.0)                     | 70 (9.0)        | 0.3648      | 211 (15.4)                                    | 70 (10.2)       | 0.1558      |
| Sex, %                                 |                                |                 | 0.0181      |                                               |                 | 0.0516      |
| Female                                 | 929 (45.5)                     | 353 (45.3)      |             | 621 (45.5)                                    | 293 (42.9)      |             |
| Male                                   | 1115 (54.5)                    | 426 (54.7)      |             | 745 (54.5)                                    | 390 (57.1)      |             |
| Social economic status, % <sup>a</sup> |                                |                 |             |                                               |                 |             |
| Non-income                             | 260 (12.9)                     | 77 (9.9)        | 0.0954      | 135 (9.9)                                     | 77 (11.3)       | 0.0452      |
| Low                                    | 480 (23.9)                     | 145 (18.7)      | 0.1281      | 293 (21.4)                                    | 138 (20.2)      | 0.0307      |
| Middle                                 | 930 (46.3)                     | 357 (45.9)      | 0.0069      | 663 (48.5)                                    | 326 (47.7)      | 0.0161      |
| High                                   | 339 (16.9)                     | 198 (25.5)      | 0.2119      | 275 (20.1)                                    | 142 (20.8)      | 0.0163      |
| Melanoma site, %                       |                                |                 |             |                                               |                 |             |
| Head and neck                          | 385 (18.8)                     | 39 (5.0)        | 0.4368      | 200 (14.6)                                    | 38 (5.6)        | 0.3047      |
| Trunk                                  | 197 (9.6)                      | 71 (9.1)        | 0.0180      | 128 (9.4)                                     | 69 (10.1)       | 0.0247      |
| Upper limb                             | 146 (7.1)                      | 82 (10.5)       | 0.1194      | 100 (7.3)                                     | 78 (11.4)       | 0.1410      |
| Lower limb                             | 841 (41.1)                     | 533 (68.4)      | 0.5698      | 602 (44.1)                                    | 452 (66.2)      | 0.4559      |
| Unspecific                             | 475 (23.2)                     | 54 (6.9)        | 0.4679      | 336 (24.6)                                    | 46 (6.7)        | 0.5070      |
| Lymph node dissection, %               | 292 (14.3)                     | 122 (15.7)      | 0.0386      | 219 (16)                                      | 102 (14.9)      | 0.0304      |
| Diabetes, %                            | 356 (17.4)                     | 92 (11.8)       | 0.1592      | 179 (13.1)                                    | 90 (13.2)       | 0.0022      |
| Hypertension, %                        | 576 (28.2)                     | 185 (23.7)      | 0.1012      | 346 (25.3)                                    | 172 (25.2)      | 0.0034      |
| Coronary artery disease, %             | 666 (32.6)                     | 182 (23.4)      | 0.2065      | 354 (25.9)                                    | 175 (25.6)      | 0.0067      |
| Stroke, %                              | 264 (12.9)                     | 51 (6.5)        | 0.2161      | 117 (8.6)                                     | 51 (7.5)        | 0.0404      |
| Congestive heart failure, %            | 147 (7.2)                      | 17 (2.2)        | 0.2387      | 37 (2.7)                                      | 17 (2.5)        | 0.0138      |
| Chronic kidney disease, %              | 112 (5.5)                      | 23 (3.0)        | 0.1260      | 52 (3.8)                                      | 23 (3.4)        | 0.0236      |
| Cirrhosis, %                           | 161 (7.9)                      | 41 (5.3)        | 0.1056      | 92 (6.7)                                      | 39 (5.7)        | 0.0424      |
| Parkinson disease, %                   | 41 (2.0)                       | 6 (0.8)         | 0.1058      | 13 (1)                                        | 6 (0.9)         | 0.0077      |
| COPD, %                                | 125 (6.1)                      | 15 (1.9)        | 0.2145      | 29 (2.1)                                      | 15 (2.2)        | 0.0050      |
| Malignancy, %                          | 292 (14.3)                     | 122 (15.7)      | 0.0711      | 498 (36.5)                                    | 243 (35.6)      | 0.0183      |

a. Social economic status was classified as non-income (no income), low (income ranges from 1-583 US\$ per month), middle (income ranges from 584-833 US\$ per month) and high (income ≥ 834 US\$ per month) categories with 49 patients unknown.; SLNB, sentinel lymph node biopsy; COPD, chronic obstructive pulmonary disease; SMD, a standardized mean difference of 0.1 or less indicates a negligible difference.

**Supplementary Table 2. Univariate analysis with survival outcomes**

| Characteristics                     | 1-year overall survival  |                   | 3-year overall survival  |                   |
|-------------------------------------|--------------------------|-------------------|--------------------------|-------------------|
|                                     | HR (95% CI)              | P value           | HR (95% CI)              | P value           |
| <b>Sentinel lymph node biopsy</b>   | <b>0.38 (0.31, 0.48)</b> | <b>&lt;0.0001</b> | <b>0.69 (0.60, 0.79)</b> | <b>&lt;0.0001</b> |
| Age group                           |                          |                   |                          |                   |
| < 50                                | 1.0                      |                   |                          |                   |
| 50-59                               | 0.95 (0.70, 1.29)        | 0.7400            | 1.17 (0.93, 1.46)        | 0.1710            |
| 60-69                               | 0.98 (0.74, 1.29)        | 0.8661            | 1.30 (1.06, 1.59)        | 0.0127            |
| 70-79                               | 1.09 (0.83, 1.42)        | 0.5366            | 1.39 (1.15, 1.70)        | 0.0009            |
| ≥ 80                                | 2.11 (1.60, 2.76)        | <0.0001           | 2.29 (1.85, 2.83)        | <0.0001           |
| Male                                | 1.25 (1.05, 1.48)        | 0.0131            | 1.34 (1.18, 1.51)        | <0.0001           |
| Social economic status <sup>a</sup> |                          |                   |                          |                   |
| Non-income                          | 1.0                      |                   | 1.0                      |                   |
| Low                                 | 1.05 (0.77, 1.43)        | 0.7645            | 0.92 (0.73, 1.15)        | 0.4580            |
| Middle                              | 1.00 (0.75, 1.32)        | 0.9768            | 1.05 (0.86, 1.29)        | 0.6164            |
| High                                | 0.70 (0.50, 0.98)        | 0.0385            | 0.68 (0.54, 0.87)        |                   |
| Melanoma site                       |                          |                   |                          | 0.0019            |
| Head and neck                       | 1.0                      |                   | 1.0                      |                   |
| Trunk                               | 1.23 (0.86, 1.76)        | 0.2631            | 1.25 (0.96, 1.63)        | 0.1020            |
| Upper limb                          | 0.71 (0.46, 1.08)        | 0.1098            | 0.75 (0.55, 1.02)        | 0.0649            |
| Lower limb                          | 0.73 (0.55, 0.98)        | 0.0339            | 0.97 (0.79, 1.19)        | 0.7464            |
| Unspecific                          | 2.28 (1.70, 3.05)        | <0.0001           | 1.87 (1.49, 2.34)        | <0.0001           |
| Lymph node dissection               | 0.54 (0.41, 0.71)        | <0.0001           | 0.99 (0.84, 1.17)        | 0.8848            |
| Diabetes                            | 1.14 (0.90, 1.46)        | 0.2766            | 1.10 (0.92, 1.31)        | 0.3134            |
| Hypertension                        | 1.03 (0.84, 1.25)        | 0.7959            | 0.96 (0.83, 1.11)        | 0.5764            |
| Coronary artery disease             | 0.98 (0.81, 1.19)        | 0.8294            | 0.97 (0.84, 1.12)        | 0.7001            |
| Stroke                              | 1.61 (1.23, 2.10)        | 0.0004            | 1.62 (1.33, 1.97)        | <0.0001           |
| Congestive heart failure            | 1.12 (0.67, 1.87)        | 0.6600            | 1.08 (0.74, 1.58)        | 0.6740            |
| Chronic kidney disease              | 1.14 (0.74, 1.76)        | 0.5623            | 1.18 (0.86, 1.61)        | 0.3060            |
| Cirrhosis                           | 1.42 (1.05, 1.92)        | 0.0249            | 1.43 (1.14, 1.79)        | 0.0021            |
| Parkinson disease                   | 0.99 (0.41, 2.39)        | 0.9856            | 1.06 (0.57, 1.97)        | 0.8583            |
| COPD                                | 1.85 (1.16, 2.97)        | 0.0100            | 1.59 (1.10, 2.30)        | 0.0140            |
| Malignancy                          | 4.73 (3.94, 5.68)        | <0.0001           | 3.21 (2.83, 3.63)        | <0.0001           |

a. Social economic status was classified as non-income (no income), low (income ranges from 1-583 US\$ per month), middle (income ranges from 584-833 US\$ per month) and high (income ≥ 834 US\$ per month) categories with 49 patients unknown.; SLNB, sentinel lymph node biopsy; COPD, chronic obstructive pulmonary disease.
